# Supplementary material for: Bacteriome and mycobiome associations in oral tongue cancer
Source: PubMed Central journal article supplement (PMC5722561; doi:10.18632/oncotarget.21921), 2017-10-19
Supplement: oncotarget-08-97273-s001.pdf [file oncotarget-08-97273-s001.pdf]

# Bacteriome and mycobiome associations in oral tongue cancer

## SUPPLEMENTARY MATERIALS

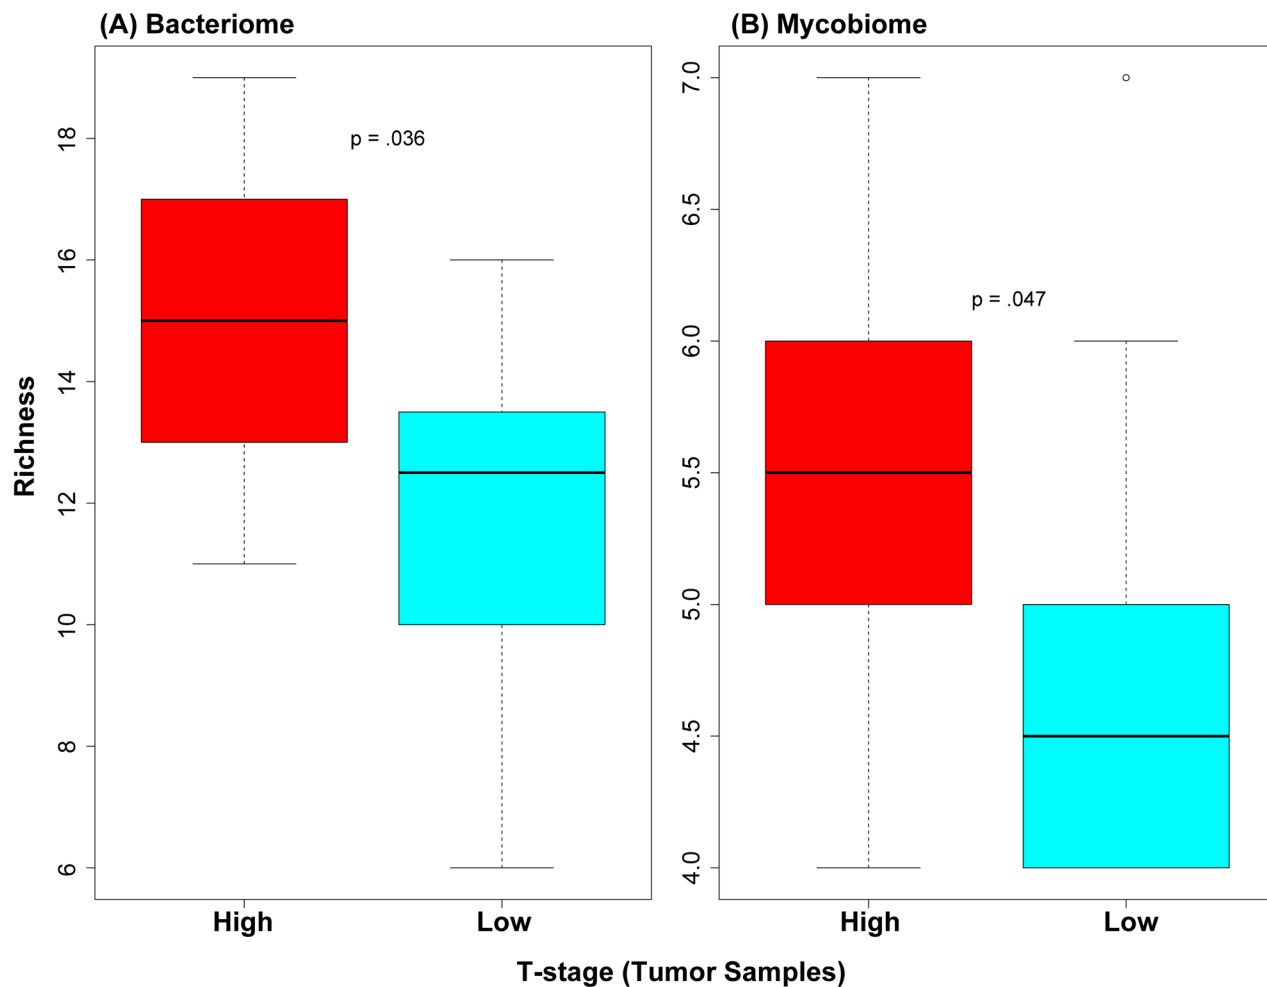

**Supplementary Figure 1:** Box and whisker plots of richness of (A) bacterial phyla and (B) fungal phyla in tumor samples with high and low T-stage. Description of data: Dark horizontal lines represent the median, with the box representing the first (Q1) and third (Q3) quartiles, the outer fences representing 1.5 x interquartile range, and the black circles representing outliers.  $P < .05$  for all comparisons between T-stages.

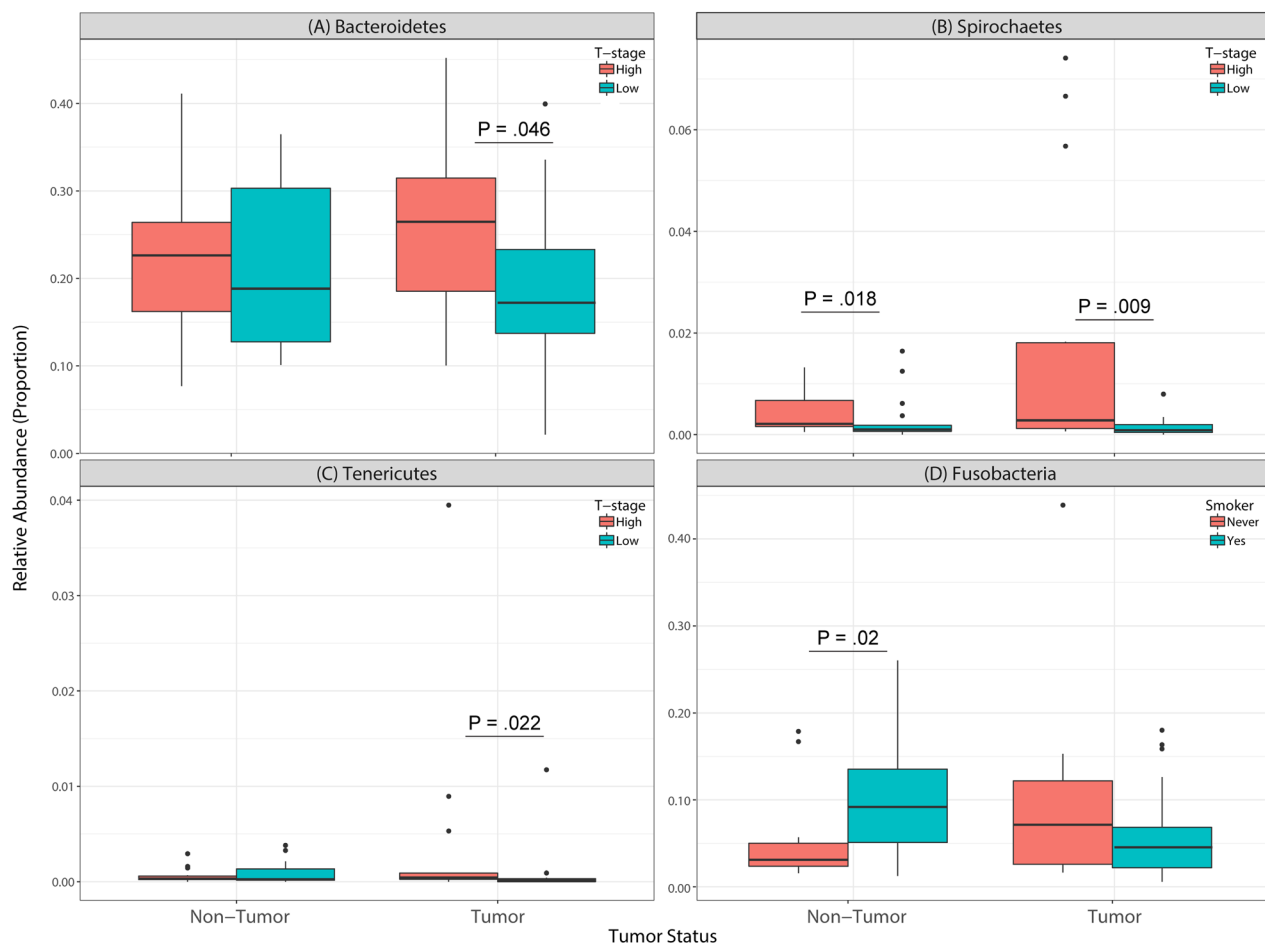

**Supplementary Figure 2: Box and whisker plots of relative abundance of four bacterial phyla found significantly different in oral tongue tumor samples and their matched normal tissue samples, between different T-stages or smoking status.** Description of data: Data were compared between (A-C) T-stage or (D) smoking status in the non-tumor and tumor groups. Dark horizontal lines represent the median, with the box representing the first (Q1) and third (Q3) quartiles, the outer fences representing 1.5 x interquartile range, and the black circles representing outliers.  $P < .05$  for all comparisons between T-stages or smoker groups.

**Supplementary Table 1 : Relative abundance of bacterial phyla in non-tumor and tumor groups. Description of data: Relative abundance is expressed as mean percent composition +/- standard deviation (SD). P-values reflect comparison between the tumor samples and non-tumor matched normal oral samples**

| Genus                     | Non-Tumor |       | Tumor |       | p-value |
|---------------------------|-----------|-------|-------|-------|---------|
|                           | Mean      | SD    | Mean  | SD    |         |
| <i>Streptococcus</i>      | 22.4%     | 9.8%  | 34.2% | 12.1% | 0.0002  |
| <i>Prevotella</i>         | 19.8%     | 10.0% | 14.2% | 7.7%  | 0.0262  |
| <i>Fusobacterium</i>      | 7.7%      | 8.9%  | 2.8%  | 3.1%  | 0.0003  |
| <i>Actinomyces</i>        | 4.2%      | 4.1%  | 8.1%  | 6.0%  | 0.0021  |
| <i>Rothia</i>             | 3.8%      | 2.9%  | 8.4%  | 5.9%  | 0.0003  |
| <i>Capnocytophaga</i>     | 3.2%      | 4.4%  | 1.6%  | 2.7%  | 0.0320  |
| <i>Parvimonas</i>         | 3.0%      | 3.1%  | 1.5%  | 2.3%  | 0.0043  |
| <i>Gemella</i>            | 2.9%      | 2.2%  | 1.9%  | 1.5%  | 0.0455  |
| <i>Porphyromonas</i>      | 2.6%      | 3.8%  | 1.1%  | 2.4%  | 0.0004  |
| <i>Campylobacter</i>      | 2.3%      | 3.5%  | 1.3%  | 2.1%  | 0.0253  |
| <i>Peptostreptococcus</i> | 1.7%      | 2.4%  | 0.7%  | 1.1%  | 0.0070  |
| <i>Aggregatibacter</i>    | 1.6%      | 3.6%  | 0.3%  | 0.3%  | 0.0013  |
| <i>Treponema</i>          | 0.8%      | 1.6%  | 0.5%  | 1.4%  | 0.0262  |
| <i>Eikenella</i>          | 0.7%      | 1.6%  | 0.2%  | 0.2%  | 0.0002  |
| <i>Peptoniphilus</i>      | 0.5%      | 1.0%  | 0.3%  | 0.8%  | 0.0024  |
| <i>Mycoplasma</i>         | 0.3%      | 0.7%  | 0.0%  | 0.1%  | 0.0017  |
| <i>Tannerella</i>         | 0.2%      | 0.6%  | 0.2%  | 0.4%  | 0.0135  |
| <i>Corynebacterium</i>    | 0.2%      | 0.2%  | 0.3%  | 0.4%  | 0.0017  |
| <i>Enterococcus</i>       | 0.2%      | 0.1%  | 0.3%  | 0.5%  | 0.0056  |
| <i>Micrococcus</i>        | 0.1%      | 0.1%  | 0.2%  | 0.3%  | 0.0166  |
| <i>Desulfobulbus</i>      | 0.1%      | 0.3%  | 0.0%  | 0.0%  | 0.0328  |
| <i>Sphingobacterium</i>   | 0.0%      | 0.2%  | 0.0%  | 0.0%  | 0.0083  |

**Supplementary Table 2 : Relative abundance of fungal phyla in non-tumor and tumor groups. Description of data: Relative abundance is expressed as mean percent composition +/- standard deviation (SD). P-values reflect comparison between the tumor samples and non-tumor matched normal oral samples**

| Fungal Genus          | Non-Tumor |      | Tumor |      | p-value |
|-----------------------|-----------|------|-------|------|---------|
|                       | Mean      | SD   | Mean  | SD   |         |
| <i>Wallemia</i>       | 1.2%      | 2.3% | 1.2%  | 1.0% | 0.047   |
| <i>Lysurus</i>        | 0.6%      | 1.5% | 0.2%  | 0.3% | 0.010   |
| <i>Leptosphaeria</i>  | 0.6%      | 0.7% | 0.3%  | 0.4% | 0.010   |
| <i>Antrodiella</i>    | 0.4%      | 0.4% | 0.2%  | 0.2% | 0.005   |
| <i>Boletus</i>        | 0.1%      | 0.2% | 0.0%  | 0.1% | 0.013   |
| <i>Ophiocordyceps</i> | 0.1%      | 0.1% | 0.4%  | 0.9% | 0.037   |
| <i>Guignardia</i>     | 0.0%      | 0.1% | 0.1%  | 0.2% | 0.043   |

Supplementary Table 3 : Correlations of *Lichtheimia corymbifera* with bacterial species. Description of data: Positive correlations of bacterial species with *L. corymbifera* appear in the left columns and negative correlations on the right

| Positive Correlations              |             | Negative Correlations                 |              |
|------------------------------------|-------------|---------------------------------------|--------------|
| Bacterial spp.                     | Coefficient | Bacterial spp.                        | Coefficient  |
| <i>Shuttleworthia.satelles</i>     | 0.435909214 | <i>Staphylococcus.epidermidis</i>     | -0.265917391 |
| <i>Capnocytophaga.ochracea</i>     | 0.347096427 | <i>Prevotella.intermedia</i>          | -0.260238735 |
| <i>Atopobium.rimae</i>             | 0.244680067 | <i>Alcaligenes.faecalis</i>           | -0.246697875 |
| <i>Micrococcus.luteus</i>          | 0.181494183 | <i>Enterococcus.casseliflavus</i>     | -0.24528205  |
| <i>Prevotella.nigrescens</i>       | 0.145370313 | <i>Treponema.amylovorum</i>           | -0.232148847 |
| <i>Sphingobacterium.multivorum</i> | 0.118410347 | <i>Bifidobacterium.longum</i>         | -0.223557894 |
| <i>Rothia.mucilaginoso</i>         | 0.082514308 | <i>Salinivibrio.costicola</i>         | -0.218429299 |
| <i>Streptococcus.anginosus</i>     | 0.059967363 | <i>Bifidobacterium.adolescentis</i>   | -0.198154189 |
| <i>Haemophilus.parainfluenzae</i>  | 0.052960097 | <i>Propionibacterium.acnes</i>        | -0.193964683 |
| <i>Prevotella.copri</i>            | 0.045408443 | <i>Bacillus.cereus</i>                | -0.18468058  |
| <i>Neisseria.subflava</i>          | 0.002149111 | <i>Uruburuella.suis</i>               | -0.183393572 |
|                                    |             | <i>Acinetobacter.guillouiae</i>       | -0.161631963 |
|                                    |             | <i>Atopobium.vaginae</i>              | -0.160834994 |
|                                    |             | <i>Lactobacillus.iners</i>            | -0.1556918   |
|                                    |             | <i>Corynebacterium.kroppenstedtii</i> | -0.152892791 |
|                                    |             | <i>Lactobacillus.salivarius</i>       | -0.15263367  |
|                                    |             | <i>Streptococcus.alactolyticus</i>    | -0.147046175 |
|                                    |             | <i>Porphyromonas.endodontalis</i>     | -0.140476415 |
|                                    |             | <i>Rothia.dentocariosa</i>            | -0.133812383 |
|                                    |             | <i>Prevotella.melaninogenica</i>      | -0.133310433 |
|                                    |             | <i>Bifidobacterium.pseudolongum</i>   | -0.116987349 |
|                                    |             | <i>Prevotella.nanceiensis</i>         | -0.107137806 |
|                                    |             | <i>Brevibacterium.aureum</i>          | -0.098438171 |
|                                    |             | <i>Pseudomonas.veronii</i>            | -0.097688359 |
|                                    |             | <i>Acinetobacter.johnsonii</i>        | -0.089697586 |
|                                    |             | <i>Haemophilus.influenzae</i>         | -0.084159388 |
|                                    |             | <i>Prevotella.pallens</i>             | -0.07238422  |
|                                    |             | <i>Campylobacter.ureolyticus</i>      | -0.071050246 |
|                                    |             | <i>Peptostreptococcus.anaerobius</i>  | -0.070198508 |
|                                    |             | <i>Lactobacillus.vaginalis</i>        | -0.066489669 |
|                                    |             | <i>Lactobacillus.reuteri</i>          | -0.058953699 |
|                                    |             | <i>Neisseria.bacilliformis</i>        | -0.058065788 |
|                                    |             | <i>Roseateles.depolymerans</i>        | -0.052908831 |
|                                    |             | <i>Prevotella.tanneriae</i>           | -0.049806743 |
|                                    |             | <i>Bacillus.flexus</i>                | -0.044219818 |
|                                    |             | <i>Aggregatibacter.segnis</i>         | -0.031707819 |
|                                    |             | <i>Streptococcus.infantis</i>         | -0.028045957 |
|                                    |             | <i>Rothia.aeria</i>                   | -0.021624684 |
|                                    |             | <i>Bergeriella.denitrificans</i>      | -0.004421025 |
